# Supplementary material for: First-principles study of ground-state properties of U2Mo
Source: Royal Society of Chemistry journal article supplement (doi:10.1039/c4cp03841j), 2014-01-01
Supplement: c4cp03841j1.pdf [file c4cp03841j1.pdf]

Electronic Supplementary Information

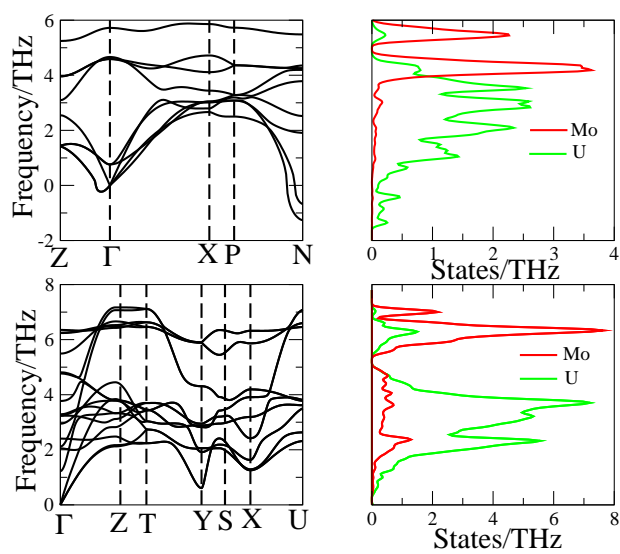

Fig.S1 (color online) The calculated phonon spectra and DOS of the  $I4/mmm$  (upper panels) and the  $Pmmn$  phases (lower panels) within DFT+D
